# Supplementary material for: Barcode clonal tracking of tissue-resident immune cells in rhesus macaque highlights distinct clonal distribution pattern of tissue NK cells
Source: Front Immunol. 2022 Nov 10;13:994498. doi: 10.3389/fimmu.2022.994498 (PMC9808525; doi:10.3389/fimmu.2022.994498)
Supplement: Supplementary file 2 [file Table_2.xlsx]

## Sheet: Sheet1
Monkey	Months	Tissues	T GFP%	B GFP%	NK GFP%
JM82	49m	PB	66.9	73.8	29.3
JM82	46m	PB	59.4	74	26.4
JM82	49m	BAL	68.4	65	77.4
JM82	46m	BAL	43.5	51.5	47.5
JM82	46m	Colon	35.6	42.5	30.4
JM82	49m	Colon	28.8	55.5	47.8
JM82	46m	Jejunum	44.9	58.8	57.9
JM82	49m	Jejunum	37.7	66.6	57.6
JM82	49m	Liver	41.1	55.6	44.6
JM82	46m	Liver	60.1	72.6	70.7
JM82	49m	Spleen	59.7	75.7	65.6
ZG66	104m	PB	19.1	25.2	54.5
ZG66	106m	PB	19.5	25.5	61.2
ZG66	104m	BAL	18.6	17.8	71.6
ZG66	106m	BAL	18.7	20.2	17.2
ZG66	104m	Colon	9.41	16.5	3.25
ZG66	106m	Colon	10.1	13.7	3.88
ZG66	104m	Jejunum	5.54	13.8	12.2
ZG66	106m	Jejunum	5.96	11.6	13.1
ZG66	104m	Liver	15.5	21.3	54.9
ZG66	106m	Liver	14.9	18.9	50.3
ZG66	104m	Spleen	14.3	18.1	45
ZG66	106m	Spleen	10.9	16.9	51.2
ZJ31	75m	PB	25.8	49.1	61
ZJ31	63m	PB	36.2	50.2	53.7
ZJ31	73.5m	BAL	26.5	33.3	48.3
ZJ31	75m	BAL	17.1	16	33.5
ZJ31	76m	Colon	9.48	24.9	12.3
ZJ31	73.5m	Colon	23.8	21	28.2
ZJ31	75m	Colon	15.7	20.8	21.8
ZJ31	76m	Jejunum	7.53	12	28.7
ZJ31	73.5m	Jejunum	14.9	23.4	29.1
ZJ31	75m	Jejunum	5.29	42.2	28
ZJ31	76m	Liver	9.29	26	19
ZJ31	73.5m	Liver	15.4	31.9	43.1
ZJ31	73.5m	Spleen	19.2	30.4	43.2
ZK22	62m	PB	37.2	42	40.9
ZK22	63m	PB	37.2	42.2	38.9
ZK22	63m	BAL	24.3	42.6	28.4
ZK22	62m	BAL	26.3	51.3	38.7
ZK22	62m	Colon	20.7	24.7	28.4
ZK22	63m	Colon	17.7	16.3	24.1
ZK22	63m	Jejunum	11.4	28.5	20.2
ZK22	62m	Jejunum	13.8	21.9	25
ZK22	62m	Liver	39.1	36.9	39.2
ZK22	63m	Liver	32.6	29.8	31.8
ZK22	62m	Spleen	33.9	38.8	34.4
ZK22	63m	Spleen	21.9	23.7	31.3
