# Supplementary material for: Barcode clonal tracking of tissue-resident immune cells in rhesus macaque highlights distinct clonal distribution pattern of tissue NK cells
Source: Front Immunol. 2022 Nov 10;13:994498. doi: 10.3389/fimmu.2022.994498 (PMC9808525; doi:10.3389/fimmu.2022.994498)
Supplement: Supplementary file 3 [file Table_3.xlsx]

## Sheet: T
Animal	timepoint	source	cell.type	cell.numbers	total_reads	Mapped Reads (%)
ZJ31	63m	PB	T	100000	4000000	86.6385
ZJ31	73.5m	PB	T	100000	4000000	86.0622
ZJ31	75m	PB	T	100000	4000000	75.9761
ZJ31	63m	BAL	T	100000	4000000	91.1484
ZJ31	73.5m	BAL	T	89000	4000000	89.4852
ZJ31	75m	BAL	T	32000	4000000	89.6436
ZJ31	63m	Liver	T	3000	4000000	73.5964
ZJ31	73.5m	Liver	T	42000	4000000	86.9185
ZJ31	76m	Liver	T	100000	4000000	87.5461
ZJ31	73.5m	Spleen	T	100000	4000000	88.2544
ZJ31	73.5m	Jejunum	T	41000	4000000	72.8298
ZJ31	75m	Jejunum	T	17800	4000000	70.8716
ZJ31	76m	Jejunum	T	130000	4000000	87.4602
ZJ31	73.5m	Colon	T	55000	4000000	87.7439
ZJ31	75m	Colon	T	4000	4000000	88.4618
ZJ31	76m	Colon	T	56000	4000000	89.727
ZK22	62m	PB	T	100000	4000000	86.0686
ZK22	63m	PB	T	100000	4000000	85.9364
ZK22	62m	BAL	T	5000	1757301	84.3027
ZK22	63m	BAL	T	4000	4000000	81.8183
ZK22	62m	Liver	T	41000	4000000	84.1106
ZK22	63m	Liver	T	59000	4000000	85.3983
ZK22	62m	Spleen	T	100000	4000000	85.7223
ZK22	63m	Spleen	T	100000	4000000	86.2087
ZK22	62m	Colon	T	5500	2097125	69.0659
ZK22	62m	Jejunum	T	12000	4000000	84.5537
ZK22	63m	Jejunum	T	2000	4000000	81.9536
A9E016	4m	PB	T	250000	4000000	88.3643
A9E016	4m	Lung3	T	100000	4000000	93.2377
A9E016	4m	Liver4	T	250000	4000000	34.6985
A9E016	4m	Liver5	T	250000	4000000	76.2716
A9E016	4m	Spleen1	T	200000	4000000	62.342
A9E016	4m	Spleen2	T	250000	3677108	57.1936
ZG66	104.5m	PB	T	100000	4000000	47.3748
ZG66	106m	PB	T	100000	4000000	84.5323
ZG66	104.5m	BAL	T	180000	4000000	45.9434
ZG66	106m	BAL	T	43000	2433726	87.0336
ZG66	104.5m	Liver	T	1000-100000	4000000	84.6889
ZG66	106m	Liver	T	24000	2145649	82.244
ZG66	104.5m	Spleen	T	100000	573345	47.2276
ZG66	106m	Spleen	T	149000	4000000	50.9958
ZG66	106m	Jejunum	T	9000	3173543	75.6661
JM82	45.5m	PB	T	100000	4000000	90.9023
JM82	47m	PB	T	100000	3658552	90.6934
JM82	48m	PB	T	100000	4000000	91.0482
JM82	46m	BAL	T	30000	4000000	93.6697
JM82	49m	BAL	T	1000-100000	4000000	96.4648
JM82	46m	Liver	T	17000	3514953	86.8521
JM82	49m	Liver	T	1000-100000	4000000	91.8276
JM82	49m	Spleen	T	1000-100000	4000000	91.5812
JM82	49.5m	Colon	T	1000-100000	4000000	84.4293
JM82	46m	Jejunum	T	5000	4000000	89.4684
JM82	49.5m	Jejunum	T	1000-100000	4000000	90.0173

## Sheet: B and Gr
Animal	timepoint	source	cell.type	cell.numbers	total_reads	Mapped Reads (%)
ZJ31	63m	PB	Gr	100000	4000000	79.6341
ZJ31	73.5m	PB	Gr	100000	4000000	87.2954
ZJ31	75m	PB	Gr	100000	4000000	88.9388
ZJ31	63m	PB	B	100000	4000000	85.8801
ZJ31	73.5m	PB	B	100000	4000000	86.5444
ZJ31	75m	PB	B	100000	4000000	88.1513
ZJ31	75m	BAL	B	3200	505133	43.2205
ZJ31	73.5m	Liver	B	2000	4000000	87.3452
ZJ31	76m	Liver	B	8000	4000000	87.8341
ZJ31	73.5m	Spleen	B	100000	4000000	87.515
ZJ31	73.5m	Jejunum	B	2000	4000000	84.6257
ZJ31	75m	Jejunum	B	5000	3997852	87.5436
ZJ31	76m	Jejunum	B	5000	4000000	88.2693
ZJ31	73.5m	Colon	B	13000	4000000	86.1876
ZJ31	76m	Colon	B	8000	4000000	81.0076
JM82	47m	PB	Gr	100000	4000000	90.1193
JM82	48m	PB	Gr	100000	4000000	89.9585
JM82	45.5m	PB	B	100000	4000000	89.6565
JM82	47m	PB	B	100000	4000000	90.5491
JM82	46m	BAL	B	2000	1418236	87.3169
JM82	49m	BAL	B	1000-100000	4000000	88.2749
JM82	46m	Liver	B	2000	4000000	90.8994
JM82	49m	Liver	B	1000-100000	3500469	86.6109
JM82	49m	Spleen	B	1000-100000	3388262	81.9003
JM82	49.5m	Jejunum	B	1000-100000	4000000	90.2562
JM82	49.5m	Colon	B	1000-100000	4000000	89.3098
ZG66	104.5m	PB	Gr	100000	4000000	91.8867
ZG66	106m	PB	Gr	100000	4000000	87.5194
ZG66	104.5m	PB	B	100000	4000000	85.0273
ZG66	106m	PB	B	100000	4000000	87.5998
ZG66	104.5m	BAL	B	1000-100000	3432661	60.8041
ZG66	104.5m	Spleen	B	100000	4000000	89.0452
ZG66	106m	Spleen	B	65000	3931819	90.162
ZG66	106m	Colon	B	17000	3651650	85.6109
ZK22	62m	PB	Gr	100000	4000000	85.8075
ZK22	62.5m	PB	Gr	100000	4000000	84.5161
ZK22	62m	PB	B	100000	4000000	85.3517
ZK22	63m	PB	B	100000	4000000	84.5602
ZK22	62m	Liver	B	6500	4000000	81.9558
ZK22	63m	Liver	B	9000	4000000	83.4019
ZK22	62m	Spleen	B	100000	4000000	85.545
ZK22	63m	Spleen	B	100000	4000000	86.2733
A9E016	3m	PB	Gr	250000	3252337	81.4904
A9E016	4m	PB	Gr	250000	4000000	35.9453
A9E016	4m	PB	B	250000	4000000	82.6108
A9E016	4m	BAL	B	100000	4000000	82.7432
A9E016	4m	Liver	B	250000	4000000	65.7106
A9E016	4m	Spleen	B	200000	4000000	69.6277

## Sheet: NK
Animal	timepoint	source	cell.type	cell.numbers	total_reads	Mapped Reads (%)
ZJ31	63m	PB	Gr	100000	4000000	79.6341
ZJ31	73.5m	PB	Gr	100000	4000000	87.2954
ZJ31	75m	PB	Gr	100000	4000000	88.9388
ZJ31	63m	PB	CD16p	100000	4000000	85.4784
ZJ31	73.5m	PB	CD16p	100000	4000000	87.8429
ZJ31	75m	PB	CD16p	100000	3778553	86.2867
ZJ31	76m	PB	CD16p	100000	4000000	88.4873
ZJ31	63m	PB	CD56p	2400	4000000	87.7379
ZJ31	73.5m	PB	CD56p	8600	4000000	87.5623
ZJ31	75m	PB	CD56p	14000	4000000	88.0485
ZJ31	76m	PB	CD56p	112000	4000000	87.9037
ZJ31	51m	PB	DN	NA	4000000	83.9761
ZJ31	76m	PB	DN	280000	4000000	88.4912
ZJ31	75m	BAL	bulk_NK	2700	217482	40.0704
ZJ31	73.5m	Liver	bulk_NK	9000	4000000	87.5198
ZJ31	76m	Liver	bulk_NK	5000	4000000	86.6598
ZJ31	73.5m	Spleen	bulk_NK	89000	4000000	86.9737
ZJ31	73.5m	Jejunum	bulk_NK	7000	4000000	85.7321
ZJ31	75m	Jejunum	bulk_NK	2000	466118	59.7184
ZK22	62m	PB	Gr	100000	4000000	85.8075
ZK22	62.5m	PB	Gr	100000	4000000	84.5161
ZK22	62m	PB	CD16p	133000	4000000	87.9527
ZK22	63m	PB	CD16p	100000	4000000	87.0594
ZK22	63m	PB	CD56p	3300	3618986	56.0377
ZK22	62m	PB	DN	7400	2035961	77.971
ZK22	63m	PB	DN	18400	4000000	88.2575
ZK22	62m	Liver	bulk_NK	26800	4000000	85.614
ZK22	63m	Liver	bulk_NK	18000	4000000	87.154
ZK22	62m	Spleen	bulk_NK	100000	4000000	86.6124
ZK22	63m	Spleen	bulk_NK	10000	4000000	87.3726
JM82	47m	PB	Gr	100000	4000000	90.1193
JM82	48m	PB	Gr	100000	4000000	89.9585
JM82	45.5m	PB	CD16p	198000	4000000	88.4417
JM82	48.5m	PB	CD16p	262000	4000000	84.8067
JM82	45.5m	PB	CD56p	2000	4000000	89.1877
JM82	48.5m	PB	CD56p	5600	4000000	89.8044
JM82	48.5m	PB	DN	10000	4000000	91.5029
JM82	49m	BAL	bulk_NK	1000-100000	4000000	96.157
JM82	46m	Liver	bulk_NK	7000	2186429	91.2449
ZG66	104.5m	PB	Gr	100000	4000000	91.8867
ZG66	106m	PB	Gr	100000	4000000	87.5194
ZG66	104.5m	PB	CD16p	100000	4000000	43.891
ZG66	106m	PB	CD16p	198000	4000000	64.9477
ZG66	104.5m	PB	CD56p	4500	4000000	6.88355
ZG66	106m	PB	CD56p	3109	3431704	81.3663
ZG66	104.5m	PB	DN	13400	4000000	4.5182
ZG66	106m	PB	DN	7108	4000000	53.5052
ZG66	104.5m	BAL	bulk_NK	1000-100000	3683615	23.2369
ZG66	104.5m	Liver	bulk_NK	1000-100000	3819939	28.6011
ZG66	104.5m	Spleen	bulk_NK	1000-100000	4000000	39.8873
ZG66	106m	Spleen	bulk_NK	15000	3255589	45.3757
