# Supplementary material for: Barcode clonal tracking of tissue-resident immune cells in rhesus macaque highlights distinct clonal distribution pattern of tissue NK cells
Source: Front Immunol. 2022 Nov 10;13:994498. doi: 10.3389/fimmu.2022.994498 (PMC9808525; doi:10.3389/fimmu.2022.994498)
Supplement: Supplementary file 4 [file Table_4.xlsx]

## Sheet: Sheet1
Antigen	Conjugation	Vendor	Catalog number	Clone
CD3	BV786	BD Horizon	309637	SP34-2
CD3	V500	BD Pharmingen	560770	SP34-2
CD20	APC-Cy7	BD Pharmingen	335794	L27
CD14	Pacific Blue	Invitrogen	MHCD1428	TuK4
CD14	PE	Biolegend	301806	TuK4
CD16	BV605	Biolegend	302012	3G8
NKG2A	PE-Cy7	Beckman Coulter	B10246	Z199
CD16	APC	Biolegend	302012	3G8
CD16	PE-Cy7	BD Pharmingen	557744	3G8
CD56	PE	BD Pharmingen	555516	B159
CD56	PE-Cy5	BD Pharmingen	555517	B159
CD49a	PE	Biolegend	328304	TS2/7
Live/dead	Aqua dye	Life technology	L34957	N/A
CD69	BV650	Biolegend	310934	FN50
CD49a	PerCP-eFlour 710	Invitrogen	320829	TS2/7
CXCR3	BV711	BD Horizon™	563156	1C6
CX3CR1	PE	Biolegend	355704	K0124E1
NKG2D	BV786	BD OptiBuild™	743560	1D11
CD27	Pacific Blue	Biolegend	356413	M-T271
CD45	BV510	BD Horizon	563530	D058-1283
CD56	PE	BD Pharmingen	555516	B159
CD107a	BV711	Biolegend	328640	LAMP-1
TNF⍺	PE	Biolegend	502909	MAb11
IFN-γ	APC	BD Pharmingen	554702	B27
N/A: not applicable
