# Supplementary material for: Barcode clonal tracking of tissue-resident immune cells in rhesus macaque highlights distinct clonal distribution pattern of tissue NK cells
Source: Front Immunol. 2022 Nov 10;13:994498. doi: 10.3389/fimmu.2022.994498 (PMC9808525; doi:10.3389/fimmu.2022.994498)
Supplement: Supplementary file 5 [file Table_5.xlsx]

## Sheet: Sheet1
Primer Names	5’-----------3’ sequences	Index
Universal reverse primer	CAAGCAGAAGACGGCATACGAGATCGTGATACGGCATACGAGCTCTTCCGATCT
Forward primers
Barcode F 2021 i512bp 1	AATGATACGGCGACCACCGAGATCTACACAAGACCAAGGAAACACTCTTTCCCTACACGACGCTCTTCCGATCT	AAGACCAAGGAA
Barcode F 2021 i512bp 2	AATGATACGGCGACCACCGAGATCTACACAAGCGGTTGTCAACACTCTTTCCCTACACGACGCTCTTCCGATCT	AAGCGGTTGTCA
Barcode F 2021 i512bp 3	AATGATACGGCGACCACCGAGATCTACACAATACCTCTTGGACACTCTTTCCCTACACGACGCTCTTCCGATCT	AATACCTCTTGG
Barcode F 2021 i512bp 4	AATGATACGGCGACCACCGAGATCTACACACAAGTCACCGAACACTCTTTCCCTACACGACGCTCTTCCGATCT	ACAAGTCACCGA
Barcode F 2021 i512bp 5	AATGATACGGCGACCACCGAGATCTACACACAGGAATCCGGACACTCTTTCCCTACACGACGCTCTTCCGATCT	ACAGGAATCCGG
Barcode F 2021 i512bp 6	AATGATACGGCGACCACCGAGATCTACACACCACGCCTGTAACACTCTTTCCCTACACGACGCTCTTCCGATCT	ACCACGCCTGTA
Barcode F 2021 i512bp 7	AATGATACGGCGACCACCGAGATCTACACACCTTAACGGTAACACTCTTTCCCTACACGACGCTCTTCCGATCT	ACCTTAACGGTA
Barcode F 2021 i512bp 8	AATGATACGGCGACCACCGAGATCTACACACTCTTCCTGCCACACTCTTTCCCTACACGACGCTCTTCCGATCT	ACTCTTCCTGCC
Barcode F 2021 i512bp 9	AATGATACGGCGACCACCGAGATCTACACACTTCCGTTCTAACACTCTTTCCCTACACGACGCTCTTCCGATCT	ACTTCCGTTCTA
Barcode F 2021 i512bp 10	AATGATACGGCGACCACCGAGATCTACACAGACCGCTCGAAACACTCTTTCCCTACACGACGCTCTTCCGATCT	AGACCGCTCGAA
Barcode F 2021 i512bp 11	AATGATACGGCGACCACCGAGATCTACACAGCCAATTCCGAACACTCTTTCCCTACACGACGCTCTTCCGATCT	AGCCAATTCCGA
Barcode F 2021 i512bp 12	AATGATACGGCGACCACCGAGATCTACACAGCGCAGTTATAACACTCTTTCCCTACACGACGCTCTTCCGATCT	AGCGCAGTTATA
Barcode F 2021 i512bp 13	AATGATACGGCGACCACCGAGATCTACACAGCGTAATGCAAACACTCTTTCCCTACACGACGCTCTTCCGATCT	AGCGTAATGCAA
Barcode F 2021 i512bp 14	AATGATACGGCGACCACCGAGATCTACACAGGTCTTATGGAACACTCTTTCCCTACACGACGCTCTTCCGATCT	AGGTCTTATGGA
Barcode F 2021 i512bp 15	AATGATACGGCGACCACCGAGATCTACACAGGTGCCAACAAACACTCTTTCCCTACACGACGCTCTTCCGATCT	AGGTGCCAACAA
Barcode F 2021 i512bp 16	AATGATACGGCGACCACCGAGATCTACACAGTATACCGGAAACACTCTTTCCCTACACGACGCTCTTCCGATCT	AGTATACCGGAA
Barcode F 2021 i512bp 17	AATGATACGGCGACCACCGAGATCTACACAGTTAGTCTCCAACACTCTTTCCCTACACGACGCTCTTCCGATCT	AGTTAGTCTCCA
Barcode F 2021 i512bp 18	AATGATACGGCGACCACCGAGATCTACACATCTCGAGATCAACACTCTTTCCCTACACGACGCTCTTCCGATCT	ATCTCGAGATCA
Barcode F 2021 i512bp 19	AATGATACGGCGACCACCGAGATCTACACCACAACGCGGAAACACTCTTTCCCTACACGACGCTCTTCCGATCT	CACAACGCGGAA
Barcode F 2021 i512bp 20	AATGATACGGCGACCACCGAGATCTACACCACCAATCTTAGACACTCTTTCCCTACACGACGCTCTTCCGATCT	CACCAATCTTAG
Barcode F 2021 i512bp 21	AATGATACGGCGACCACCGAGATCTACACCACGGTATTGTAACACTCTTTCCCTACACGACGCTCTTCCGATCT	CACGGTATTGTA
Barcode F 2021 i512bp 22	AATGATACGGCGACCACCGAGATCTACACCAGCTCCTGGAAACACTCTTTCCCTACACGACGCTCTTCCGATCT	CAGCTCCTGGAA
Barcode F 2021 i512bp 23	AATGATACGGCGACCACCGAGATCTACACCCAATTGTCTGAACACTCTTTCCCTACACGACGCTCTTCCGATCT	CCAATTGTCTGA
Barcode F 2021 i512bp 24	AATGATACGGCGACCACCGAGATCTACACCCACTAATTGGAACACTCTTTCCCTACACGACGCTCTTCCGATCT	CCACTAATTGGA
Barcode F 2021 i512bp 25	AATGATACGGCGACCACCGAGATCTACACCCAGAAGTCCAAACACTCTTTCCCTACACGACGCTCTTCCGATCT	CCAGAAGTCCAA
Barcode F 2021 i512bp 26	AATGATACGGCGACCACCGAGATCTACACCCATCAGCGCTAACACTCTTTCCCTACACGACGCTCTTCCGATCT	CCATCAGCGCTA
Barcode F 2021 i512bp 27	AATGATACGGCGACCACCGAGATCTACACCCGTTACAAGAAACACTCTTTCCCTACACGACGCTCTTCCGATCT	CCGTTACAAGAA
Barcode F 2021 i512bp 28	AATGATACGGCGACCACCGAGATCTACACCCTGTTCTTCGGACACTCTTTCCCTACACGACGCTCTTCCGATCT	CCTGTTCTTCGG
Barcode F 2021 i512bp 29	AATGATACGGCGACCACCGAGATCTACACCCTTCATGTGAAACACTCTTTCCCTACACGACGCTCTTCCGATCT	CCTTCATGTGAA
Barcode F 2021 i512bp 30	AATGATACGGCGACCACCGAGATCTACACCGAATCAGAGAAACACTCTTTCCCTACACGACGCTCTTCCGATCT	CGAATCAGAGAA
Barcode F 2021 i512bp 31	AATGATACGGCGACCACCGAGATCTACACCGACCGGATTAAACACTCTTTCCCTACACGACGCTCTTCCGATCT	CGACCGGATTAA
Barcode F 2021 i512bp 32	AATGATACGGCGACCACCGAGATCTACACCGAGACCTTGTGACACTCTTTCCCTACACGACGCTCTTCCGATCT	CGAGACCTTGTG
Barcode F 2021 i512bp 33	AATGATACGGCGACCACCGAGATCTACACCGGATAACTCGAACACTCTTTCCCTACACGACGCTCTTCCGATCT	CGGATAACTCGA
Barcode F 2021 i512bp 34	AATGATACGGCGACCACCGAGATCTACACCGGCGCTATGAAACACTCTTTCCCTACACGACGCTCTTCCGATCT	CGGCGCTATGAA
Barcode F 2021 i512bp 35	AATGATACGGCGACCACCGAGATCTACACCGTTCGACACAAACACTCTTTCCCTACACGACGCTCTTCCGATCT	CGTTCGACACAA
Barcode F 2021 i512bp 36	AATGATACGGCGACCACCGAGATCTACACCTAACCGTCTCCACACTCTTTCCCTACACGACGCTCTTCCGATCT	CTAACCGTCTCC
Barcode F 2021 i512bp 37	AATGATACGGCGACCACCGAGATCTACACCTAGACATAGCAACACTCTTTCCCTACACGACGCTCTTCCGATCT	CTAGACATAGCA
Barcode F 2021 i512bp 38	AATGATACGGCGACCACCGAGATCTACACCTCCGGTGATAAACACTCTTTCCCTACACGACGCTCTTCCGATCT	CTCCGGTGATAA
Barcode F 2021 i512bp 39	AATGATACGGCGACCACCGAGATCTACACCTCTAGGAAGAAACACTCTTTCCCTACACGACGCTCTTCCGATCT	CTCTAGGAAGAA
Barcode F 2021 i512bp 40	AATGATACGGCGACCACCGAGATCTACACCTGTTAAGCGTAACACTCTTTCCCTACACGACGCTCTTCCGATCT	CTGTTAAGCGTA
Barcode F 2021 i512bp 41	AATGATACGGCGACCACCGAGATCTACACCTTCCAATACCAACACTCTTTCCCTACACGACGCTCTTCCGATCT	CTTCCAATACCA
Barcode F 2021 i512bp 42	AATGATACGGCGACCACCGAGATCTACACGACCTAGATACAACACTCTTTCCCTACACGACGCTCTTCCGATCT	GACCTAGATACA
Barcode F 2021 i512bp 43	AATGATACGGCGACCACCGAGATCTACACGACTGGACGGAAACACTCTTTCCCTACACGACGCTCTTCCGATCT	GACTGGACGGAA
Barcode F 2021 i512bp 44	AATGATACGGCGACCACCGAGATCTACACGAGACACGACAAACACTCTTTCCCTACACGACGCTCTTCCGATCT	GAGACACGACAA
Barcode F 2021 i512bp 45	AATGATACGGCGACCACCGAGATCTACACGCAAGCATGCCAACACTCTTTCCCTACACGACGCTCTTCCGATCT	GCAAGCATGCCA
Barcode F 2021 i512bp 46	AATGATACGGCGACCACCGAGATCTACACGCACGCGTTGAAACACTCTTTCCCTACACGACGCTCTTCCGATCT	GCACGCGTTGAA
Barcode F 2021 i512bp 47	AATGATACGGCGACCACCGAGATCTACACGCACTCTACTAAACACTCTTTCCCTACACGACGCTCTTCCGATCT	GCACTCTACTAA
Barcode F 2021 i512bp 48	AATGATACGGCGACCACCGAGATCTACACGCCGAACCTGAAACACTCTTTCCCTACACGACGCTCTTCCGATCT	GCCGAACCTGAA
Barcode F 2021 i512bp 49	AATGATACGGCGACCACCGAGATCTACACGCTCAATACTGGACACTCTTTCCCTACACGACGCTCTTCCGATCT	GCTCAATACTGG
Barcode F 2021 i512bp 50	AATGATACGGCGACCACCGAGATCTACACGGAGAAGAAGAAACACTCTTTCCCTACACGACGCTCTTCCGATCT	GGAGAAGAAGAA
Barcode F 2021 i512bp 51	AATGATACGGCGACCACCGAGATCTACACGGATCAGTTCAAACACTCTTTCCCTACACGACGCTCTTCCGATCT	GGATCAGTTCAA
Barcode F 2021 i512bp 52	AATGATACGGCGACCACCGAGATCTACACGGATTCTTGGAAACACTCTTTCCCTACACGACGCTCTTCCGATCT	GGATTCTTGGAA
Barcode F 2021 i512bp 53	AATGATACGGCGACCACCGAGATCTACACGGCCACTGTTAAACACTCTTTCCCTACACGACGCTCTTCCGATCT	GGCCACTGTTAA
Barcode F 2021 i512bp 54	AATGATACGGCGACCACCGAGATCTACACGGCCTCCAAGAAACACTCTTTCCCTACACGACGCTCTTCCGATCT	GGCCTCCAAGAA
Barcode F 2021 i512bp 55	AATGATACGGCGACCACCGAGATCTACACGGCGTGACATAAACACTCTTTCCCTACACGACGCTCTTCCGATCT	GGCGTGACATAA
Barcode F 2021 i512bp 56	AATGATACGGCGACCACCGAGATCTACACGGTAAGGTGGAAACACTCTTTCCCTACACGACGCTCTTCCGATCT	GGTAAGGTGGAA
Barcode F 2021 i512bp 57	AATGATACGGCGACCACCGAGATCTACACGGTGAATCGCGAACACTCTTTCCCTACACGACGCTCTTCCGATCT	GGTGAATCGCGA
Barcode F 2021 i512bp 58	AATGATACGGCGACCACCGAGATCTACACGTACGAAGGTTAACACTCTTTCCCTACACGACGCTCTTCCGATCT	GTACGAAGGTTA
Barcode F 2021 i512bp 59	AATGATACGGCGACCACCGAGATCTACACGTGCTGTAGCAAACACTCTTTCCCTACACGACGCTCTTCCGATCT	GTGCTGTAGCAA
Barcode F 2021 i512bp 60	AATGATACGGCGACCACCGAGATCTACACGTGGATTGACAAACACTCTTTCCCTACACGACGCTCTTCCGATCT	GTGGATTGACAA
Barcode F 2021 i512bp 61	AATGATACGGCGACCACCGAGATCTACACGTGTTCCTCTTAACACTCTTTCCCTACACGACGCTCTTCCGATCT	GTGTTCCTCTTA
Barcode F 2021 i512bp 62	AATGATACGGCGACCACCGAGATCTACACGTTACCTTGCAAACACTCTTTCCCTACACGACGCTCTTCCGATCT	GTTACCTTGCAA
Barcode F 2021 i512bp 63	AATGATACGGCGACCACCGAGATCTACACGTTCACGGAGAAACACTCTTTCCCTACACGACGCTCTTCCGATCT	GTTCACGGAGAA
Barcode F 2021 i512bp 64	AATGATACGGCGACCACCGAGATCTACACGTTCTGCTTCGAACACTCTTTCCCTACACGACGCTCTTCCGATCT	GTTCTGCTTCGA
Barcode F 2021 i512bp 65	AATGATACGGCGACCACCGAGATCTACACGTTGGTCAAGAAACACTCTTTCCCTACACGACGCTCTTCCGATCT	GTTGGTCAAGAA
Barcode F 2021 i512bp 66	AATGATACGGCGACCACCGAGATCTACACTAACGGCAAGAAACACTCTTTCCCTACACGACGCTCTTCCGATCT	TAACGGCAAGAA
Barcode F 2021 i512bp 67	AATGATACGGCGACCACCGAGATCTACACTAGAGGAGTGAGACACTCTTTCCCTACACGACGCTCTTCCGATCT	TAGAGGAGTGAG
Barcode F 2021 i512bp 68	AATGATACGGCGACCACCGAGATCTACACTATCGCATCCAAACACTCTTTCCCTACACGACGCTCTTCCGATCT	TATCGCATCCAA
Barcode F 2021 i512bp 69	AATGATACGGCGACCACCGAGATCTACACTCACCGAGGTAAACACTCTTTCCCTACACGACGCTCTTCCGATCT	TCACCGAGGTAA
Barcode F 2021 i512bp 70	AATGATACGGCGACCACCGAGATCTACACTCCGTTGTTGCCACACTCTTTCCCTACACGACGCTCTTCCGATCT	TCCGTTGTTGCC
